# Supplementary material for: Tailings after Iron Extraction in Bayer Red Mud by Biomass Reduction: Pozzolanic Activity and Hydration Characteristics
Source: MDPI journal article supplement (doi:10.3390/ma14143955), 2021-07-15
Supplement: s1 [file s1]

Article

# Tailings after Iron Extraction in Bayer Red Mud by Biomass Reduction: Pozzolan Activity and Hydration Characteristics

The chemical constituents of Tailings is shown in Table S1. Tailings was the materials after iron extraction from BRM. The major chemical constituents of Tailings were  $\text{Al}_2\text{O}_3$  (31.47%),  $\text{SiO}_2$  (28.82%) and  $\text{CaO}$  (24.35%).

**Table S1.** The chemical constituents of Tailings (wt.%).

| Oxides   | $\text{Fe}_2\text{O}_3$ | $\text{Al}_2\text{O}_3$ | $\text{SiO}_2$ | $\text{Na}_2\text{O}$ | $\text{CaO}$ | $\text{TiO}_2$ | $\text{MgO}$ | Other |
|----------|-------------------------|-------------------------|----------------|-----------------------|--------------|----------------|--------------|-------|
| Tailings | 5.21                    | 31.47                   | 28.82          | 5.66                  | 24.35        | 3.27           | 0.29         | 0.93  |

The particle size distribution was measured by the laser particle size distribution instrument (mastersizer-2000). The test results of Tailings was shown in Figure S1, and  $d_{10}$  was 0.89  $\mu\text{m}$ ,  $d_{50}$  was 4.34  $\mu\text{m}$ , and  $d_{90}$  was 33.57  $\mu\text{m}$ .

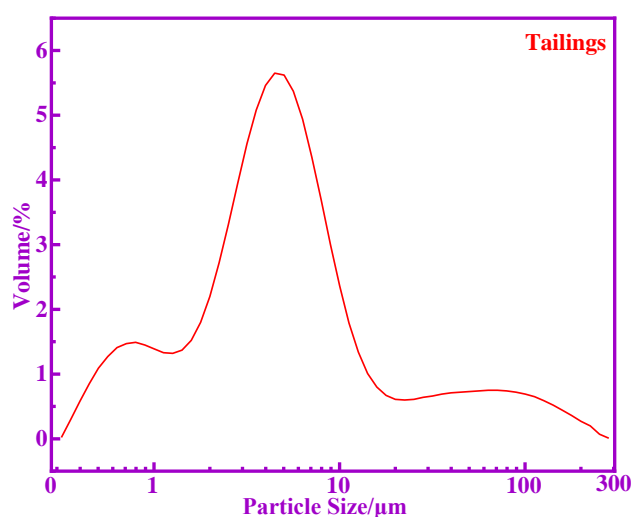

**Figure S1.** The particle distribution of Tailings.
